# Supplementary material for: Identifying lncRNAs and mRNAs related to survival of NSCLC based on bioinformatic analysis and machine learning
Source: publisher site journal article supplement (doi:10.18632/aging.205783), 2024-05-01
Supplement: Supplementary file [file aging-v16i9-205783-supplementary-material-SD1.pdf]

**SUPPLEMENTARY FIGURES**

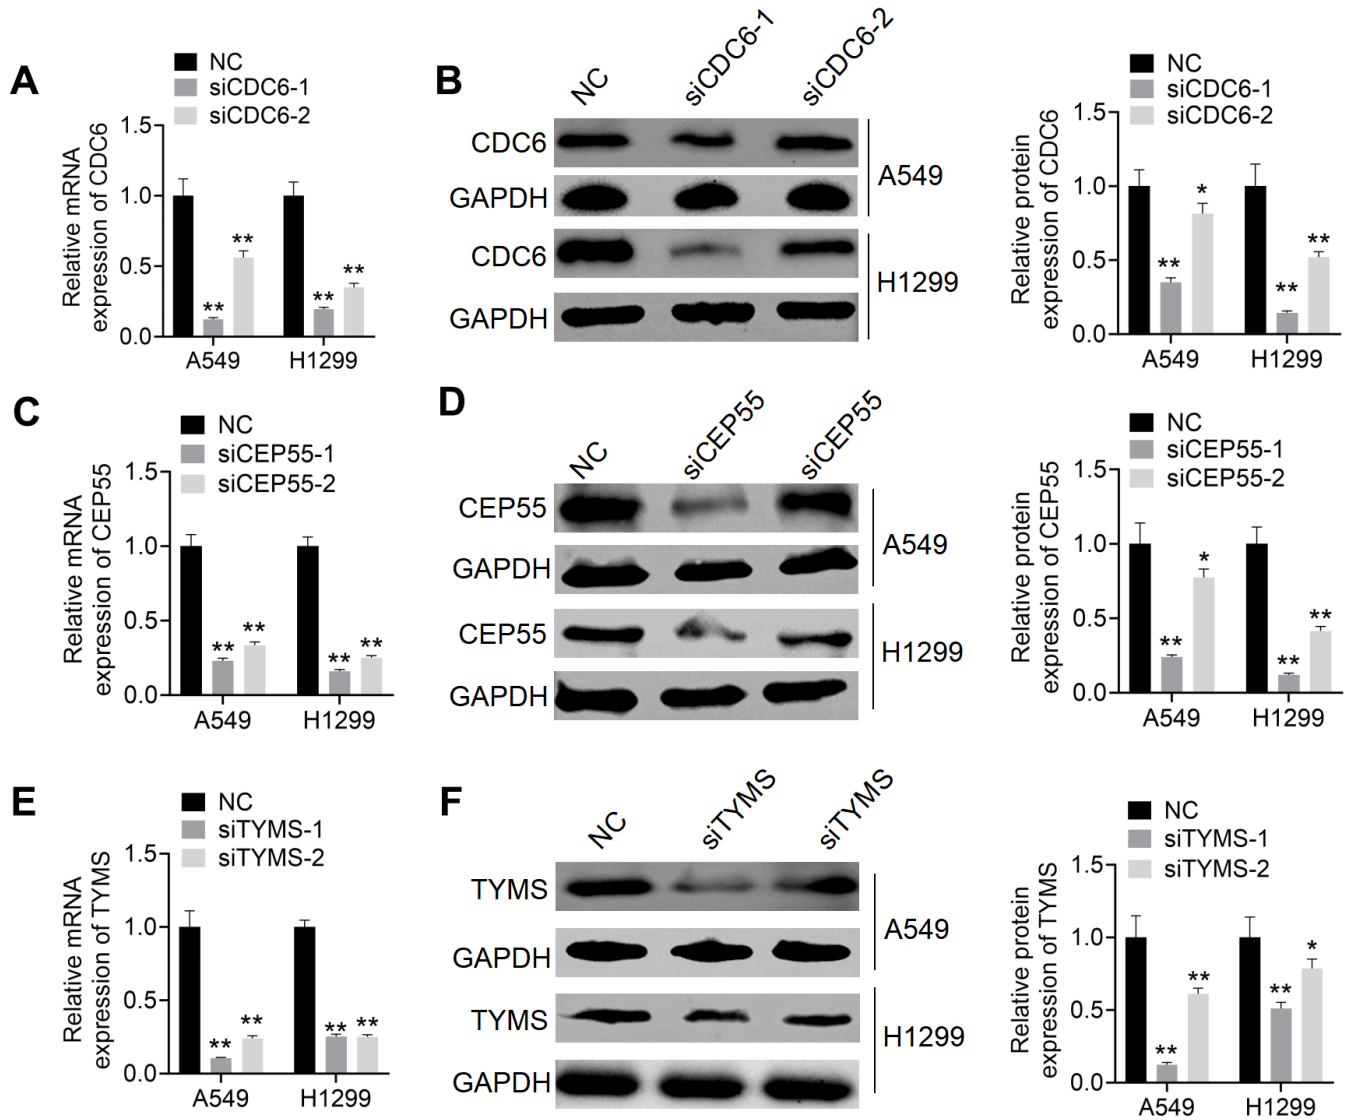

**Supplementary Figure 1. Transfection efficiency was examined by PCR and western blot. (A, B)** RT-PCR and western blot were performed to examine the transfection efficiency of CDC6 knockdown. **(C, D)** RT-PCR and western blot were performed to examine the transfection efficiency of CEP55 knockdown. **(E, F)** RT-PCR and western blot were performed to examine the transfection efficiency of TYMS knockdown. \* $P < 0.05$ , \*\* $P < 0.01$  vs NC group.

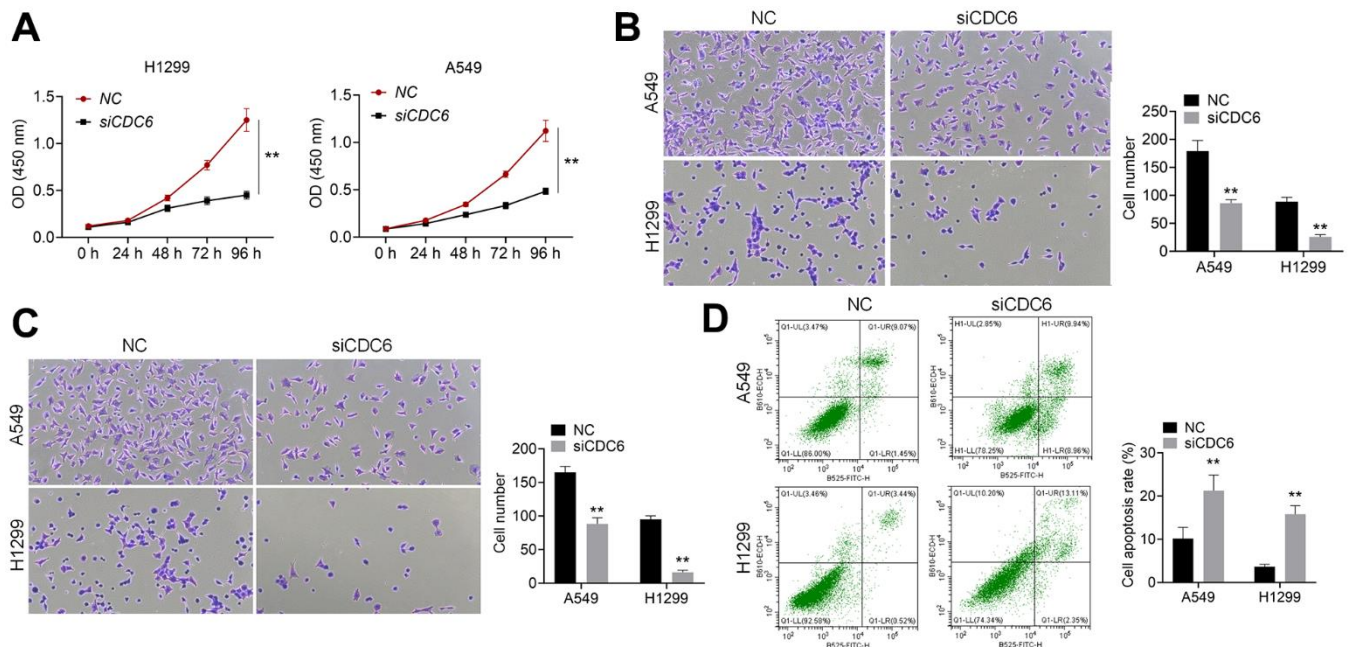

**Supplementary Figure 2. Effect of CDC6 knockdown on malignant oncology phenotype in NSCLC cells.** (A) Cell proliferation was examined by CCK8. (B, C) Cell migration and invasion were tested by Transwell assay. (D) Cell apoptosis was evaluated by FITC. \* $P < 0.05$ , \*\* $P < 0.01$  vs NC group.

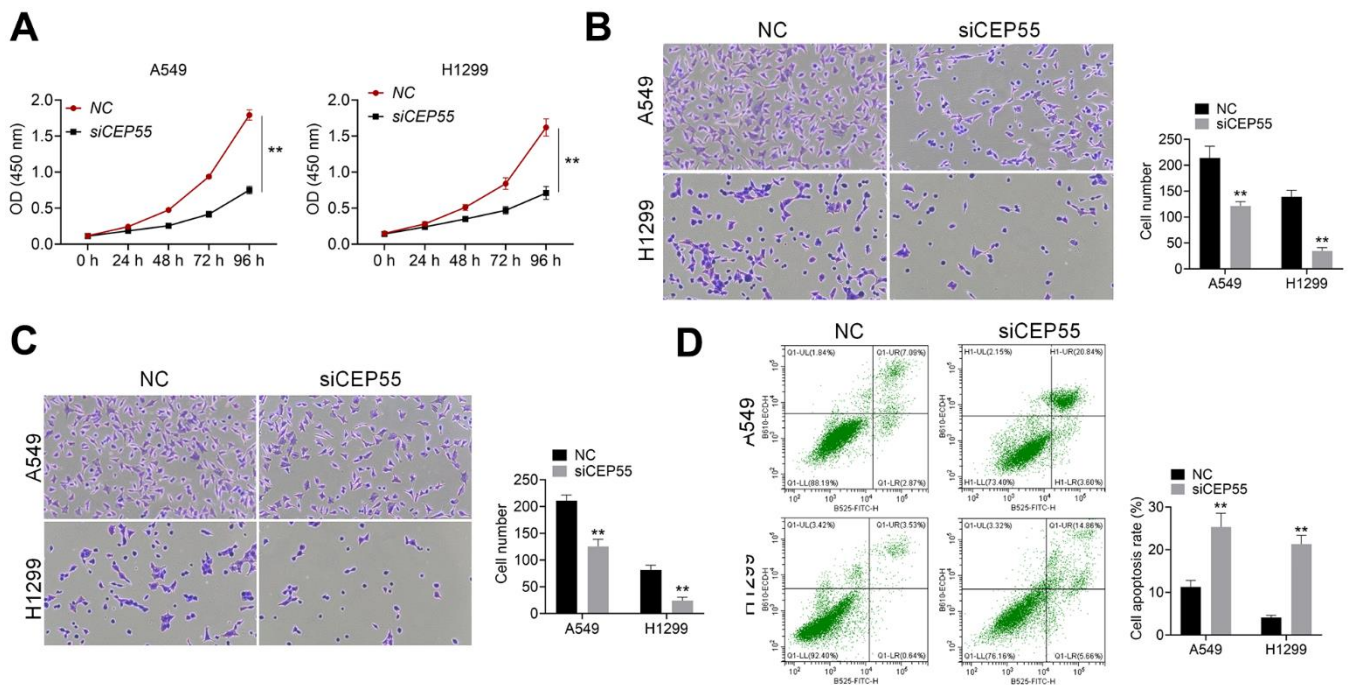

**Supplementary Figure 3. Effect of CEP55 knockdown on malignant oncology phenotype in NSCLC cells.** (A) Cell proliferation was examined by CCK8. (B, C) Cell migration and invasion were tested by Transwell assay. (D) Cell apoptosis was evaluated by FITC. \* $P < 0.05$ , \*\* $P < 0.01$  vs NC group.

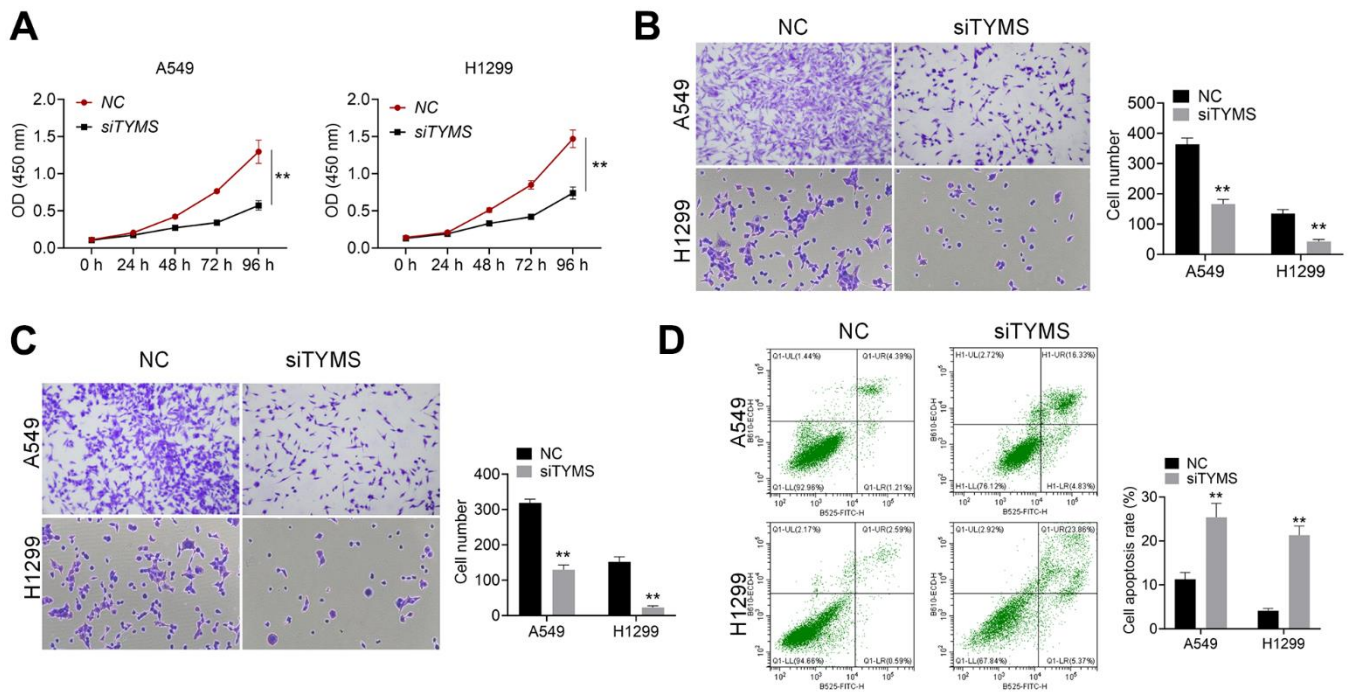

**Supplementary Figure 4. Effect of TYMS knockdown on malignant oncology phenotype in NSCLC cells. (A)** Cell proliferation was examined by CCK8. **(B, C)** Cell migration and invasion were tested by Transwell assay. **(D)** Cell apoptosis was evaluated by FITC. \* $P < 0.05$ , \*\* $P < 0.01$  vs NC group.
