# Supplementary material for: Identifying lncRNAs and mRNAs related to survival of NSCLC based on bioinformatic analysis and machine learning
Source: Aging (Albany NY). 2024 May 1;16(9):7799–817. doi: 10.18632/aging.205783 (PMC11131976; doi:10.18632/aging.205783)
Supplement: Supplementary Table 1 [file aging-16-205783-s002.xlsx]

## Sheet: T-C
Symbol	gene	Type	logFC	P.Value	FDR
BANCR	ENSG00000278910.2	lncRNA	-1.25139	5.55e-43	3.65e-42
FAM83A-AS1	ENSG00000204949.7	lncRNA	0.99603	4.01e-20	1.11e-19
FEZF1-AS1	ENSG00000230316.5	lncRNA	1.1565	8.29e-25	2.73e-24
HLA-DQB1-AS1	ENSG00000223534.1	lncRNA	-1.05255	1.89e-24	6.14e-24
SH3BP5-AS1	ENSG00000224660.1	lncRNA	-0.642574	1.76e-25	5.93e-25
SNHG12	ENSG00000197989.12	lncRNA	0.600499	2.78e-14	6.05e-14
SNHG3	ENSG00000242125.3	lncRNA	1.00967	1.96e-32	8.6e-32
VIM-AS1	ENSG00000229124.5	lncRNA	-0.747258	1.27e-33	5.82e-33
ABCA3	ENSG00000167972.12	mRNA	-3.4369	7.5e-79	1.96e-77
ADAMTS8	ENSG00000134917.9	mRNA	-2.45531	2.08e-137	5.55e-134
ADRB2	ENSG00000169252.5	mRNA	-1.90928	3.48e-96	2.09e-94
AGER	ENSG00000204305.12	mRNA	-5.52118	2.72e-120	7.52e-118
AKAP12	ENSG00000131016.15	mRNA	-1.7538	1.6e-50	1.44e-49
ALDOA	ENSG00000149925.15	mRNA	1.28119	4.03e-60	5.05e-59
ANKRD29	ENSG00000154065.15	mRNA	-1.83672	3.05e-74	6.53e-73
ANKRD44	ENSG00000065413.15	mRNA	-1.0589	4.88e-66	7.6e-65
ANLN	ENSG00000011426.9	mRNA	2.60486	3.66e-111	5.2e-109
ARHGAP11A	ENSG00000198826.9	mRNA	1.62416	5.02e-90	2.14e-88
ARHGAP30	ENSG00000186517.12	mRNA	-1.20081	7.42e-45	5.24e-44
ARHGEF6	ENSG00000129675.14	mRNA	-1.43462	1.98e-70	3.62e-69
ARNTL2	ENSG00000029153.13	mRNA	2.1344	1.2e-72	2.43e-71
ATP13A4	ENSG00000127249.13	mRNA	-2.41317	1.45e-73	3.03e-72
ATP8A1	ENSG00000124406.15	mRNA	-1.78259	1.83e-83	5.78e-82
AURKA	ENSG00000087586.16	mRNA	2.17198	1.37e-103	1.22e-101
B3GNT8	ENSG00000177191.2	mRNA	-1.38675	1.09e-36	5.62e-36
B4GALNT1	ENSG00000135454.12	mRNA	1.04369	6.99e-31	2.89e-30
BANK1	ENSG00000153064.10	mRNA	-1.04828	1.3e-49	1.13e-48
BIRC5	ENSG00000089685.13	mRNA	3.03549	1.83e-116	3.91e-114
BMP5	ENSG00000112175.7	mRNA	-1.95269	3.9e-72	7.68e-71
BTG2	ENSG00000159388.5	mRNA	-1.30658	2.9e-36	1.47e-35
BTK	ENSG00000010671.14	mRNA	-1.35728	4.42e-63	6.16e-62
BTNL9	ENSG00000165810.15	mRNA	-1.98011	4.33e-86	1.56e-84
BUB1	ENSG00000169679.13	mRNA	1.91533	3.11e-100	2.32e-98
BUB1B	ENSG00000156970.11	mRNA	2.12624	1.44e-106	1.57e-104
C1QTNF6	ENSG00000133466.12	mRNA	1.3133	9.71e-51	8.77e-50
C5orf38	ENSG00000186493.10	mRNA	-1.26201	1.26e-26	4.44e-26
CACNA2D2	ENSG00000007402.10	mRNA	-3.71084	2.15e-118	5.22e-116
CAPS	ENSG00000105519.11	mRNA	-1.18333	5.67e-20	1.56e-19
CAT	ENSG00000121691.4	mRNA	-1.74246	5.91e-89	2.41e-87
CBX7	ENSG00000100307.11	mRNA	-1.25051	8.48e-72	1.65e-70
CCNA2	ENSG00000145386.8	mRNA	2.44179	8.4e-109	1.08e-106
CCNB1	ENSG00000134057.13	mRNA	2.614	1.61e-114	3e-112
CCNB2	ENSG00000157456.6	mRNA	2.55217	8.53e-116	1.73e-113
CCNE1	ENSG00000105173.12	mRNA	1.85949	5e-76	1.15e-74
CD1C	ENSG00000158481.11	mRNA	-1.41968	1.32e-46	1.01e-45
CD300LF	ENSG00000186074.17	mRNA	-1.8012	3.63e-76	8.39e-75
CD69	ENSG00000110848.7	mRNA	-1.43386	4.77e-45	3.38e-44
CDC20	ENSG00000117399.12	mRNA	3.21548	4.16e-122	1.39e-119
CDC25C	ENSG00000158402.17	mRNA	1.24973	7.52e-79	1.96e-77
CDC6	ENSG00000094804.8	mRNA	2.19124	7.72e-103	6.55e-101
CDCA5	ENSG00000146670.8	mRNA	2.44226	3.1e-114	5.71e-112
CDCA8	ENSG00000134690.9	mRNA	2.423	7.26e-113	1.18e-110
CDCP1	ENSG00000163814.6	mRNA	1.15098	4.87e-35	2.35e-34
CDK1	ENSG00000170312.14	mRNA	2.32703	3.37e-102	2.81e-100
CDKN3	ENSG00000100526.18	mRNA	2.14198	5.32e-92	2.53e-90
CDT1	ENSG00000167513.7	mRNA	2.13888	5.61e-100	4.09e-98
CENPA	ENSG00000115163.13	mRNA	2.19701	2.45e-106	2.62e-104
CENPF	ENSG00000117724.11	mRNA	2.18078	6.06e-94	3.18e-92
CENPU	ENSG00000151725.10	mRNA	1.8746	1.21e-85	4.25e-84
CEP55	ENSG00000138180.14	mRNA	2.50072	2.22e-110	3e-108
CGNL1	ENSG00000128849.10	mRNA	-2.16463	6.46e-104	5.9e-102
CHRDL1	ENSG00000101938.13	mRNA	-2.72817	5.49e-90	2.32e-88
CIITA	ENSG00000179583.16	mRNA	-1.02571	6.76e-30	2.7e-29
CKAP2L	ENSG00000169607.11	mRNA	1.68925	1.87e-98	1.25e-96
CKS1B	ENSG00000173207.11	mRNA	1.79658	2.74e-83	8.49e-82
CLEC10A	ENSG00000132514.12	mRNA	-1.13275	4.18e-34	1.95e-33
CLEC3B	ENSG00000163815.5	mRNA	-3.57939	7.56e-126	4.33e-123
CLIC6	ENSG00000159212.11	mRNA	-1.27961	6.43e-16	1.49e-15
COL4A3	ENSG00000169031.17	mRNA	-2.07023	3.26e-103	2.84e-101
COL4A4	ENSG00000081052.11	mRNA	-1.79199	1.85e-83	5.83e-82
CPA3	ENSG00000163751.3	mRNA	-2.10426	1.1e-47	8.73e-47
CPED1	ENSG00000106034.16	mRNA	-1.46823	4.08e-92	1.96e-90
CSF2RB	ENSG00000100368.12	mRNA	-1.06174	5.96e-26	2.04e-25
CTSG	ENSG00000100448.3	mRNA	-1.03605	6.54e-39	3.64e-38
CTSH	ENSG00000103811.14	mRNA	-2.18043	1.35e-60	1.72e-59
CTSV	ENSG00000136943.9	mRNA	1.89646	9.18e-62	1.22e-60
CXCL17	ENSG00000189377.7	mRNA	-2.24669	2.41e-30	9.79e-30
DAAM2	ENSG00000146122.15	mRNA	-1.71669	1.02e-84	3.44e-83
DAPK2	ENSG00000035664.10	mRNA	-1.40939	4.76e-96	2.84e-94
DEPDC1B	ENSG00000035499.11	mRNA	1.61474	6.62e-86	2.35e-84
DKK1	ENSG00000107984.8	mRNA	1.01781	2.39e-10	4.42e-10
DLGAP5	ENSG00000126787.11	mRNA	2.26108	6.98e-108	8.55e-106
DNALI1	ENSG00000163879.10	mRNA	-1.85542	1.07e-65	1.64e-64
DNASE1L3	ENSG00000163687.12	mRNA	-1.36816	1.98e-56	2.2e-55
DOCK2	ENSG00000134516.14	mRNA	-1.09879	2.23e-44	1.55e-43
DPEP2	ENSG00000167261.12	mRNA	-1.59777	1.1e-102	9.26e-101
DSG2	ENSG00000046604.11	mRNA	1.7679	5.01e-65	7.5e-64
DTL	ENSG00000143476.16	mRNA	1.62909	3.49e-82	1.03e-80
E2F7	ENSG00000165891.14	mRNA	1.32087	2.14e-71	4.06e-70
ECT2	ENSG00000114346.12	mRNA	2.1282	2.44e-90	1.06e-88
EGLN3	ENSG00000129521.12	mRNA	2.08779	4.77e-48	3.87e-47
ESYT3	ENSG00000158220.12	mRNA	-1.55605	1.18e-96	7.2e-95
EXO1	ENSG00000174371.15	mRNA	1.79471	2.33e-98	1.53e-96
F2RL1	ENSG00000164251.4	mRNA	1.02546	7.7e-21	2.18e-20
FAM111B	ENSG00000189057.9	mRNA	1.51065	1.56e-60	1.99e-59
FAM189A2	ENSG00000135063.16	mRNA	-2.63124	1.97e-120	5.56e-118
FAM83A	ENSG00000147689.15	mRNA	2.17367	1.46e-32	6.44e-32
FAM83B	ENSG00000168143.8	mRNA	2.11747	1.33e-82	4.03e-81
FGL2	ENSG00000127951.5	mRNA	-1.25251	2.56e-29	9.99e-29
FGR	ENSG00000000938.11	mRNA	-1.8304	2e-74	4.31e-73
FKBP4	ENSG00000004478.7	mRNA	1.66262	5.1e-78	1.27e-76
FMO2	ENSG00000094963.12	mRNA	-2.60881	2.71e-83	8.42e-82
FOXM1	ENSG00000111206.11	mRNA	2.77179	1.02e-107	1.23e-105
FSCN1	ENSG00000075618.16	mRNA	2.25307	8.84e-64	1.26e-62
FSTL3	ENSG00000070404.8	mRNA	-1.43529	1.97e-37	1.04e-36
GABRE	ENSG00000102287.15	mRNA	1.18945	9.38e-21	2.65e-20
GAPDH	ENSG00000111640.13	mRNA	2.09837	5.1e-91	2.29e-89
GDF10	ENSG00000266524.2	mRNA	-2.44894	2.44e-132	4.18e-129
GGTLC1	ENSG00000149435.11	mRNA	-3.94882	3.91e-129	3.92e-126
GIMAP8	ENSG00000171115.3	mRNA	-2.09545	1.51e-105	1.5e-103
GINS1	ENSG00000101003.9	mRNA	2.05649	1.75e-101	1.4e-99
GJB3	ENSG00000188910.7	mRNA	2.84782	6.58e-73	1.34e-71
GNG7	ENSG00000176533.11	mRNA	-1.10753	2.71e-63	3.81e-62
GPD1L	ENSG00000152642.9	mRNA	-1.67677	2.55e-82	7.58e-81
GPI	ENSG00000105220.13	mRNA	1.48334	1.07e-65	1.64e-64
GPRIN2	ENSG00000204175.5	mRNA	-1.91336	2.98e-69	5.2e-68
GRASP	ENSG00000161835.9	mRNA	-1.58865	7.69e-69	1.32e-67
GTSE1	ENSG00000075218.17	mRNA	1.83973	8.36e-99	5.73e-97
H2AFX	ENSG00000188486.3	mRNA	1.56868	8.17e-71	1.52e-69
HJURP	ENSG00000123485.10	mRNA	2.26917	1.47e-106	1.59e-104
HLA-DMB	ENSG00000242574.7	mRNA	-1.41094	1.6e-33	7.29e-33
HLF	ENSG00000108924.12	mRNA	-1.58078	4.98e-50	4.4e-49
HMGA1	ENSG00000137309.18	mRNA	2.41542	7.31e-101	5.64e-99
HMMR	ENSG00000072571.18	mRNA	1.7321	3.3e-84	1.09e-82
HPGDS	ENSG00000163106.9	mRNA	-1.62043	2.61e-95	1.47e-93
ICAM5	ENSG00000105376.4	mRNA	-1.03409	5.53e-30	2.22e-29
IER5L	ENSG00000188483.7	mRNA	1.0209	1.42e-30	5.83e-30
IGSF10	ENSG00000152580.8	mRNA	-1.13636	9.23e-57	1.04e-55
IL20RB	ENSG00000174564.11	mRNA	2.08898	2.95e-36	1.49e-35
IL33	ENSG00000137033.10	mRNA	-2.01979	2.12e-50	1.9e-49
IRF8	ENSG00000140968.9	mRNA	-1.2535	4.22e-39	2.36e-38
IRX2	ENSG00000170561.11	mRNA	-1.7668	5.53e-34	2.57e-33
ITGA6	ENSG00000091409.13	mRNA	1.28085	1.91e-27	6.94e-27
ITGAL	ENSG00000005844.16	mRNA	-1.48839	6.33e-48	5.11e-47
ITGAX	ENSG00000140678.15	mRNA	-1.03908	2.16e-28	8.17e-28
KCNJ15	ENSG00000157551.16	mRNA	-1.71444	3.96e-48	3.22e-47
KCTD12	ENSG00000178695.5	mRNA	-1.72224	3.2e-68	5.32e-67
KHDRBS2	ENSG00000112232.8	mRNA	-1.63431	8.15e-122	2.67e-119
KIF11	ENSG00000138160.5	mRNA	2.1098	2.17e-108	2.75e-106
KIF14	ENSG00000118193.10	mRNA	1.35945	7.53e-81	2.1e-79
KIF20A	ENSG00000112984.10	mRNA	2.12255	2.91e-106	3.05e-104
KIF23	ENSG00000137807.12	mRNA	1.91728	1.02e-105	1.02e-103
KIF2C	ENSG00000142945.11	mRNA	2.51063	1.03e-113	1.8e-111
KIF4A	ENSG00000090889.11	mRNA	2.26746	1.92e-111	2.78e-109
KPNA2	ENSG00000182481.7	mRNA	2.15789	1.44e-99	1.03e-97
KRT6A	ENSG00000205420.9	mRNA	6.17939	1.28e-87	4.96e-86
LAMC2	ENSG00000058085.13	mRNA	1.04836	7.25e-11	1.36e-10
LDHA	ENSG00000134333.12	mRNA	1.23838	2.59e-54	2.68e-53
LIFR	ENSG00000113594.8	mRNA	-1.84525	3.19e-66	5.01e-65
LMNB1	ENSG00000113368.10	mRNA	1.72824	1.73e-80	4.77e-79
LOXL2	ENSG00000134013.14	mRNA	1.05346	2.09e-19	5.58e-19
LRIG3	ENSG00000139263.10	mRNA	1.00461	1.82e-25	6.13e-25
LYPD3	ENSG00000124466.8	mRNA	3.35354	3.93e-73	8.08e-72
MACF1	ENSG00000127603.22	mRNA	-1.08585	7.11e-47	5.47e-46
MAD2L1	ENSG00000164109.12	mRNA	1.86034	8.38e-94	4.32e-92
MAMDC2	ENSG00000165072.9	mRNA	-2.53698	6.48e-105	6.12e-103
MBIP	ENSG00000151332.17	mRNA	-1.66402	9.01e-76	2.05e-74
MELK	ENSG00000165304.6	mRNA	2.39074	3.31e-99	2.33e-97
METTL7A	ENSG00000185432.11	mRNA	-1.75872	2.18e-51	2.01e-50
MFSD2A	ENSG00000168389.16	mRNA	-1.95012	3.04e-67	4.92e-66
MPEG1	ENSG00000197629.5	mRNA	-1.30404	8.63e-35	4.13e-34
MS4A15	ENSG00000166961.13	mRNA	-3.86225	4.4e-116	9.29e-114
MS4A2	ENSG00000149534.7	mRNA	-1.35815	5.21e-86	1.85e-84
MS4A7	ENSG00000166927.11	mRNA	-2.14349	1.72e-78	4.37e-77
MT1A	ENSG00000205362.9	mRNA	-1.79454	1.35e-38	7.43e-38
MTHFD2	ENSG00000065911.10	mRNA	1.64406	1.78e-67	2.9e-66
MYBL2	ENSG00000101057.14	mRNA	3.48083	2.15e-119	5.57e-117
MYH11	ENSG00000133392.15	mRNA	-1.71516	2.74e-31	1.15e-30
NCAPG	ENSG00000109805.8	mRNA	1.86333	2.78e-101	2.18e-99
NCAPH	ENSG00000121152.8	mRNA	2.26432	1.23e-108	1.56e-106
NCF4	ENSG00000100365.13	mRNA	-1.10637	1.25e-31	5.31e-31
NDC80	ENSG00000080986.11	mRNA	1.93439	2.09e-94	1.13e-92
NEDD9	ENSG00000111859.15	mRNA	-1.84175	1.06e-64	1.57e-63
NEIL3	ENSG00000109674.3	mRNA	1.29488	9.98e-62	1.32e-60
NEK2	ENSG00000117650.11	mRNA	2.28801	2.79e-105	2.7e-103
NFIX	ENSG00000008441.15	mRNA	-1.38822	9.33e-44	6.34e-43
NGEF	ENSG00000066248.13	mRNA	1.05001	3.15e-32	1.37e-31
NR0B2	ENSG00000131910.4	mRNA	-2.21098	1.64e-77	4.02e-76
NUSAP1	ENSG00000137804.11	mRNA	2.42172	2.08e-110	2.83e-108
OIP5	ENSG00000104147.7	mRNA	1.68489	1.81e-89	7.47e-88
P2RY13	ENSG00000181631.6	mRNA	-1.13823	1.06e-45	7.75e-45
PABPC1L	ENSG00000101104.11	mRNA	1.11356	3.7e-25	1.23e-24
PAICS	ENSG00000128050.7	mRNA	1.60717	1.71e-84	5.7e-83
PBK	ENSG00000168078.8	mRNA	2.25833	5.95e-93	3.01e-91
PFKP	ENSG00000067057.15	mRNA	1.75709	7.53e-66	1.17e-64
PKMYT1	ENSG00000127564.15	mRNA	1.78188	2.68e-93	1.37e-91
PKP2	ENSG00000057294.12	mRNA	1.15138	1.39e-29	5.49e-29
PLCB2	ENSG00000137841.10	mRNA	-1.04183	2.69e-39	1.52e-38
PLCH2	ENSG00000149527.16	mRNA	1.08099	2.38e-34	1.12e-33
PLEK2	ENSG00000100558.7	mRNA	1.55545	4.68e-36	2.36e-35
PLEKHB1	ENSG00000021300.12	mRNA	-1.55949	1.8e-50	1.61e-49
PLEKHH2	ENSG00000152527.12	mRNA	-1.33509	1.37e-64	2e-63
PLK1	ENSG00000166851.13	mRNA	2.33139	1.27e-114	2.42e-112
PLXNB3	ENSG00000198753.10	mRNA	1.43297	2.41e-49	2.07e-48
PPP2R2C	ENSG00000074211.12	mRNA	1.61696	4.52e-43	2.98e-42
PRC1	ENSG00000198901.12	mRNA	2.2838	1.65e-110	2.26e-108
PRR11	ENSG00000068489.11	mRNA	1.85664	4.32e-92	2.06e-90
PSMD2	ENSG00000175166.15	mRNA	1.3322	3.95e-66	6.19e-65
PTGER4	ENSG00000171522.5	mRNA	-1.06016	6.8e-35	3.26e-34
PTPRC	ENSG00000081237.17	mRNA	-1.35668	1.13e-33	5.19e-33
PTTG1	ENSG00000164611.11	mRNA	2.29084	7.55e-106	7.72e-104
RAB11FIP1	ENSG00000156675.14	mRNA	-1.65235	4.88e-56	5.34e-55
RASSF2	ENSG00000101265.14	mRNA	-1.47491	4.12e-53	4.06e-52
RCSD1	ENSG00000198771.9	mRNA	-1.14137	1.57e-46	1.19e-45
RGL1	ENSG00000143344.14	mRNA	-1.14699	3.8e-47	2.95e-46
RHOV	ENSG00000104140.6	mRNA	3.09003	9.7e-77	2.3e-75
RRM2	ENSG00000171848.12	mRNA	2.68437	1.16e-107	1.37e-105
RTKN2	ENSG00000182010.9	mRNA	-2.58454	3.18e-128	2.43e-125
SASH3	ENSG00000122122.9	mRNA	-1.21573	6.27e-33	2.81e-32
SCARF1	ENSG00000074660.14	mRNA	-1.48467	5.09e-85	1.74e-83
SCN7A	ENSG00000136546.12	mRNA	-2.32203	2.89e-126	1.72e-123
SEC14L6	ENSG00000214491.7	mRNA	-2.10754	7.76e-121	2.22e-118
SERPINB5	ENSG00000206075.12	mRNA	3.81802	5.47e-90	2.32e-88
SFTA3	ENSG00000229415.8	mRNA	-3.46497	2.44e-91	1.12e-89
SKA1	ENSG00000154839.8	mRNA	1.76341	5.07e-92	2.42e-90
SKA3	ENSG00000165480.14	mRNA	1.6871	1.61e-95	9.25e-94
SLA	ENSG00000155926.12	mRNA	-1.232	4.96e-45	3.52e-44
SLC15A2	ENSG00000163406.9	mRNA	-1.22611	1.17e-36	5.98e-36
SLC16A1	ENSG00000155380.10	mRNA	2.0929	4.63e-70	8.36e-69
SLC16A4	ENSG00000168679.16	mRNA	-2.02049	1e-69	1.78e-68
SLC2A1	ENSG00000117394.18	mRNA	4.06149	5.01e-114	9.14e-112
SLC43A3	ENSG00000134802.16	mRNA	-1.10801	3.4e-31	1.42e-30
SLC7A5	ENSG00000103257.7	mRNA	2.74028	3.83e-78	9.61e-77
SLIT3	ENSG00000184347.13	mRNA	-1.96731	4.66e-87	1.76e-85
SMOX	ENSG00000088826.16	mRNA	1.39482	1.43e-53	1.44e-52
SMS	ENSG00000102172.14	mRNA	1.01666	3.63e-39	2.04e-38
SNX30	ENSG00000148158.15	mRNA	-1.65332	2.93e-91	1.33e-89
SORCS2	ENSG00000184985.15	mRNA	-1.09054	8.99e-26	3.06e-25
SPAG5	ENSG00000076382.15	mRNA	2.04992	1.44e-91	6.69e-90
SPC24	ENSG00000161888.10	mRNA	1.75282	3.61e-89	1.48e-87
SPC25	ENSG00000152253.7	mRNA	1.70194	5.95e-91	2.65e-89
SPOCK1	ENSG00000152377.11	mRNA	1.45301	2.5e-37	1.32e-36
STC2	ENSG00000113739.9	mRNA	1.18113	6.51e-26	2.23e-25
STYK1	ENSG00000060140.7	mRNA	1.20847	3.37e-53	3.34e-52
SUSD4	ENSG00000143502.13	mRNA	1.43139	4.14e-32	1.79e-31
TBX4	ENSG00000121075.8	mRNA	-1.94736	2e-92	9.81e-91
TCF21	ENSG00000118526.6	mRNA	-2.3501	3.45e-136	7.91e-133
TFAP2A	ENSG00000137203.9	mRNA	2.05484	9.69e-90	4.08e-88
THEMIS2	ENSG00000130775.14	mRNA	-1.26113	2.41e-42	1.55e-41
TK1	ENSG00000167900.10	mRNA	2.76804	2.96e-105	2.84e-103
TLR2	ENSG00000137462.6	mRNA	-1.29897	4.95e-43	3.26e-42
TMEM130	ENSG00000166448.13	mRNA	-1.45427	2.43e-47	1.91e-46
TMEM163	ENSG00000152128.13	mRNA	-1.72569	5.47e-69	9.47e-68
TMEM173	ENSG00000184584.11	mRNA	-1.15304	8.68e-39	4.81e-38
TMEM243	ENSG00000135185.10	mRNA	-1.35286	9.87e-77	2.34e-75
TMPRSS2	ENSG00000184012.10	mRNA	-2.47422	1.59e-68	2.68e-67
TNFRSF19	ENSG00000127863.14	mRNA	-1.05831	1.18e-22	3.57e-22
TNFRSF25	ENSG00000215788.8	mRNA	1.18508	9.75e-36	4.85e-35
TNS4	ENSG00000131746.11	mRNA	3.19083	3.21e-74	6.85e-73
TNXB	ENSG00000168477.16	mRNA	-2.22856	5.83e-121	1.7e-118
TOX	ENSG00000198846.5	mRNA	-1.08522	2.05e-35	1.01e-34
TPI1	ENSG00000111669.13	mRNA	1.46115	1.66e-73	3.45e-72
TPPP	ENSG00000171368.11	mRNA	-1.3609	1.24e-37	6.6e-37
TPSAB1	ENSG00000172236.15	mRNA	-1.81341	1.65e-44	1.15e-43
TPX2	ENSG00000088325.14	mRNA	3.23397	7.69e-123	3.01e-120
TRIB3	ENSG00000101255.9	mRNA	1.08572	1.11e-25	3.76e-25
TSKU	ENSG00000182704.7	mRNA	1.86965	4.61e-68	7.61e-67
TXN	ENSG00000136810.11	mRNA	1.05914	2.03e-25	6.83e-25
TYMS	ENSG00000176890.14	mRNA	1.81507	1.47e-78	3.77e-77
UBE2C	ENSG00000175063.15	mRNA	3.60657	2.25e-123	9.01e-121
UBE2S	ENSG00000108106.12	mRNA	2.07129	1.36e-92	6.78e-91
UBE2T	ENSG00000077152.8	mRNA	2.63433	2.97e-111	4.26e-109
UCK2	ENSG00000143179.11	mRNA	1.68399	3.69e-81	1.05e-79
UNC13B	ENSG00000198722.11	mRNA	-1.74257	6.19e-72	1.2e-70
VIPR1	ENSG00000114812.11	mRNA	-2.09874	3.72e-97	2.35e-95
WDFY4	ENSG00000128815.16	mRNA	-1.03534	3.19e-44	2.21e-43
YWHAZ	ENSG00000164924.16	mRNA	1.06168	1.52e-61	2e-60
ZNF692	ENSG00000171163.14	mRNA	1.10436	6.85e-41	4.14e-40
ZNF750	ENSG00000141579.6	mRNA	1.57972	1.06e-34	5.07e-34
ZWINT	ENSG00000122952.15	mRNA	2.29871	1.28e-105	1.28e-103

## Sheet: D-A
Supplementary Table 1. DERs filtered in tumor vs. control and dead vs. alive.
Symbol	gene	Type	logFC	P.Value	FDR
FEZF1-AS1	ENSG00000230316.5	lncRNA	-0.83249	0.0011979	0.0186228
SNHG12	ENSG00000197989.12	lncRNA	-0.787195	8.26e-06	0.00351018
BANCR	ENSG00000278910.2	lncRNA	-0.745474	0.00015899	0.00838359
SNHG3	ENSG00000242125.3	lncRNA	-0.710963	0.000180648	0.00858821
HLA-DQB1-AS1	ENSG00000223534.1	lncRNA	-0.705551	0.0018873	0.0227256
SH3BP5-AS1	ENSG00000224660.1	lncRNA	-0.593155	8.42e-06	0.00351018
VIM-AS1	ENSG00000229124.5	lncRNA	-0.523514	0.00014029	0.00793423
FAM83A-AS1	ENSG00000204949.7	lncRNA	0.989649	6.88e-05	0.00655651
AGER	ENSG00000204305.12	mRNA	-1.44683	0.00287456	0.0280262
CXCL17	ENSG00000189377.7	mRNA	-1.33916	0.00259462	0.026669
GGTLC1	ENSG00000149435.11	mRNA	-1.14473	0.000487736	0.0126484
TMPRSS2	ENSG00000184012.10	mRNA	-1.08604	0.000387334	0.0112243
ABCA3	ENSG00000167972.12	mRNA	-1.05364	0.00722372	0.0418059
CLIC6	ENSG00000159212.11	mRNA	-1.04043	0.00373669	0.0315127
SFTA3	ENSG00000229415.8	mRNA	-1.03566	0.00426471	0.0333329
MS4A15	ENSG00000166961.13	mRNA	-0.975516	0.00441066	0.0337362
CLEC3B	ENSG00000163815.5	mRNA	-0.960574	0.00155933	0.0207808
ATP13A4	ENSG00000127249.13	mRNA	-0.955416	0.00085002	0.0164612
PABPC1L	ENSG00000101104.11	mRNA	-0.955054	7.47e-05	0.00656273
TPPP	ENSG00000171368.11	mRNA	-0.928236	6.94e-05	0.00655651
CPA3	ENSG00000163751.3	mRNA	-0.917592	0.0039781	0.032186
CACNA2D2	ENSG00000007402.10	mRNA	-0.911666	0.00551202	0.0369504
FAM189A2	ENSG00000135063.16	mRNA	-0.904151	7.46e-05	0.00656273
FMO2	ENSG00000094963.12	mRNA	-0.896697	0.00168364	0.0217276
MYH11	ENSG00000133392.15	mRNA	-0.894325	0.00677302	0.0405422
IRX2	ENSG00000170561.11	mRNA	-0.892108	0.00614991	0.0387179
SUSD4	ENSG00000143502.13	mRNA	-0.886082	0.00123179	0.0189056
GABRE	ENSG00000102287.15	mRNA	-0.884068	0.00232993	0.0254454
GPRIN2	ENSG00000204175.5	mRNA	-0.84172	0.000320397	0.010806
KCNJ15	ENSG00000157551.16	mRNA	-0.84052	0.00119153	0.0186228
HLF	ENSG00000108924.12	mRNA	-0.831512	0.0003536	0.0110164
PLXNB3	ENSG00000198753.10	mRNA	-0.829902	0.000115352	0.00712254
COL4A3	ENSG00000169031.17	mRNA	-0.827494	1.84e-05	0.00396174
MS4A7	ENSG00000166927.11	mRNA	-0.804896	0.000954568	0.0170491
LIFR	ENSG00000113594.8	mRNA	-0.795457	0.000547296	0.0132723
IL33	ENSG00000137033.10	mRNA	-0.776697	0.00910963	0.0473901
SORCS2	ENSG00000184985.15	mRNA	-0.773538	0.000936567	0.0170054
CHRDL1	ENSG00000101938.13	mRNA	-0.767002	0.00718114	0.0417795
CTSH	ENSG00000103811.14	mRNA	-0.761333	0.00854021	0.045429
MFSD2A	ENSG00000168389.16	mRNA	-0.751081	0.00196851	0.0232044
ZNF750	ENSG00000141579.6	mRNA	-0.75065	0.00953865	0.0484907
TPSAB1	ENSG00000172236.15	mRNA	-0.747488	0.00877693	0.0462715
HLA-DMB	ENSG00000242574.7	mRNA	-0.744416	0.0045547	0.0339919
GPD1L	ENSG00000152642.9	mRNA	-0.743591	5.98e-05	0.00640549
METTL7A	ENSG00000185432.11	mRNA	-0.742959	0.00395164	0.0321051
CIITA	ENSG00000179583.16	mRNA	-0.741779	0.000232236	0.00965239
CAPS	ENSG00000105519.11	mRNA	-0.73184	0.0070824	0.0416549
MPEG1	ENSG00000197629.5	mRNA	-0.72661	0.00212165	0.0239529
CD69	ENSG00000110848.7	mRNA	-0.726545	0.000965687	0.0170491
PTPRC	ENSG00000081237.17	mRNA	-0.721641	0.00411869	0.0327334
C5orf38	ENSG00000186493.10	mRNA	-0.719769	0.00708346	0.0416549
RAB11FIP1	ENSG00000156675.14	mRNA	-0.715461	0.00173011	0.0220437
B3GNT8	ENSG00000177191.2	mRNA	-0.713638	0.00349518	0.0308645
CGNL1	ENSG00000128849.10	mRNA	-0.707217	0.000634022	0.0141763
NR0B2	ENSG00000131910.4	mRNA	-0.705407	0.00503501	0.0355755
MBIP	ENSG00000151332.17	mRNA	-0.696825	0.000293653	0.0105702
IRF8	ENSG00000140968.9	mRNA	-0.695102	0.00109746	0.0180079
LRIG3	ENSG00000139263.10	mRNA	-0.687906	0.00151005	0.0206978
BTNL9	ENSG00000165810.15	mRNA	-0.684638	0.00106981	0.0177424
FGL2	ENSG00000127951.5	mRNA	-0.682268	0.00632077	0.039179
TNFRSF19	ENSG00000127863.14	mRNA	-0.678705	0.00556746	0.0372107
ITGAL	ENSG00000005844.16	mRNA	-0.670618	0.00299095	0.0285609
PLEKHB1	ENSG00000021300.12	mRNA	-0.670236	0.00363035	0.0313342
CD300LF	ENSG00000186074.17	mRNA	-0.662336	0.00144799	0.0201277
ADAMTS8	ENSG00000134917.9	mRNA	-0.660857	0.000692632	0.0149859
GDF10	ENSG00000266524.2	mRNA	-0.659779	0.000938508	0.0170054
NEDD9	ENSG00000111859.15	mRNA	-0.657238	0.00509753	0.035705
CD1C	ENSG00000158481.11	mRNA	-0.654562	0.00236161	0.0256517
VIPR1	ENSG00000114812.11	mRNA	-0.650194	0.00109927	0.0180079
TNFRSF25	ENSG00000215788.8	mRNA	-0.648558	0.00217392	0.0243376
ARHGAP30	ENSG00000186517.12	mRNA	-0.642334	0.000636552	0.0141933
MAMDC2	ENSG00000165072.9	mRNA	-0.641476	0.00758247	0.0429458
ANKRD29	ENSG00000154065.15	mRNA	-0.641053	0.00288239	0.0280262
BTG2	ENSG00000159388.5	mRNA	-0.640438	0.00471883	0.0345562
KCTD12	ENSG00000178695.5	mRNA	-0.636424	0.00286076	0.0279359
ADRB2	ENSG00000169252.5	mRNA	-0.636158	0.000859419	0.0164612
CLEC10A	ENSG00000132514.12	mRNA	-0.633318	0.00210028	0.0238457
NFIX	ENSG00000008441.15	mRNA	-0.632213	0.00436933	0.0335302
SLC15A2	ENSG00000163406.9	mRNA	-0.63116	0.00361329	0.0312673
TMEM130	ENSG00000166448.13	mRNA	-0.626647	0.00353604	0.0310205
ZNF692	ENSG00000171163.14	mRNA	-0.622655	0.000606483	0.0139092
BTK	ENSG00000010671.14	mRNA	-0.62193	0.00038526	0.0112047
SASH3	ENSG00000122122.9	mRNA	-0.621484	0.00641819	0.0395083
ESYT3	ENSG00000158220.12	mRNA	-0.615845	6.59e-05	0.00655651
DNALI1	ENSG00000163879.10	mRNA	-0.615811	0.00813101	0.0443696
BMP5	ENSG00000112175.7	mRNA	-0.615506	0.00825904	0.0445986
UNC13B	ENSG00000198722.11	mRNA	-0.614725	0.00324681	0.0299456
SNX30	ENSG00000148158.15	mRNA	-0.613852	0.000298332	0.0106432
RTKN2	ENSG00000182010.9	mRNA	-0.612287	0.00370814	0.0315127
ICAM5	ENSG00000105376.4	mRNA	-0.612242	0.0022795	0.0251685
CSF2RB	ENSG00000100368.12	mRNA	-0.605288	0.0079006	0.0440376
PLCB2	ENSG00000137841.10	mRNA	-0.603328	0.000527634	0.0129918
ATP8A1	ENSG00000124406.15	mRNA	-0.58881	0.00244937	0.0259532
COL4A4	ENSG00000081052.11	mRNA	-0.58523	0.00265535	0.0268823
SLIT3	ENSG00000184347.13	mRNA	-0.583329	0.0051533	0.0358763
TLR2	ENSG00000137462.6	mRNA	-0.58286	0.00539827	0.0366909
CBX7	ENSG00000100307.11	mRNA	-0.582074	9.53e-05	0.00670682
SCN7A	ENSG00000136546.12	mRNA	-0.580826	0.00280737	0.0275823
ITGAX	ENSG00000140678.15	mRNA	-0.577867	0.00536647	0.0365676
MS4A2	ENSG00000149534.7	mRNA	-0.574908	4.39e-05	0.00558648
GNG7	ENSG00000176533.11	mRNA	-0.573473	5.76e-05	0.0063307
TMEM163	ENSG00000152128.13	mRNA	-0.571518	0.00702914	0.041457
P2RY13	ENSG00000181631.6	mRNA	-0.568828	0.00124555	0.0189715
SLC43A3	ENSG00000134802.16	mRNA	-0.565357	0.00872752	0.0461044
DNASE1L3	ENSG00000163687.12	mRNA	-0.563748	0.00144523	0.0201277
FGR	ENSG00000000938.11	mRNA	-0.562966	0.00868837	0.0459703
NCF4	ENSG00000100365.13	mRNA	-0.558927	0.0082897	0.044643
SLA	ENSG00000155926.12	mRNA	-0.556934	0.00376865	0.0315496
RASSF2	ENSG00000101265.14	mRNA	-0.556568	0.00822607	0.0445251
TBX4	ENSG00000121075.8	mRNA	-0.554759	0.00526997	0.0362175
PLEKHH2	ENSG00000152527.12	mRNA	-0.55378	0.000844433	0.0164123
ARHGEF6	ENSG00000129675.14	mRNA	-0.551935	0.00155197	0.0207808
GIMAP8	ENSG00000171115.3	mRNA	-0.548402	0.00549834	0.0369504
WDFY4	ENSG00000128815.16	mRNA	-0.542291	0.000793188	0.015993
ANKRD44	ENSG00000065413.15	mRNA	-0.540559	4.42e-05	0.00558648
TOX	ENSG00000198846.5	mRNA	-0.53954	0.00596039	0.0381836
DAAM2	ENSG00000146122.15	mRNA	-0.536328	0.00410845	0.0326844
THEMIS2	ENSG00000130775.14	mRNA	-0.534523	0.00912483	0.0474078
DPEP2	ENSG00000167261.12	mRNA	-0.530446	0.000578415	0.0136571
PLCH2	ENSG00000149527.16	mRNA	-0.530197	0.00789525	0.0440376
TNXB	ENSG00000168477.16	mRNA	-0.527938	0.0049925	0.0355051
SCARF1	ENSG00000074660.14	mRNA	-0.526437	0.000987145	0.0172143
CPED1	ENSG00000106034.16	mRNA	-0.523754	0.000493206	0.0126484
TMEM173	ENSG00000184584.11	mRNA	-0.523379	0.00839834	0.0449895
KHDRBS2	ENSG00000112232.8	mRNA	-0.518855	0.000204487	0.0090686
TCF21	ENSG00000118526.6	mRNA	-0.517526	0.00588686	0.0378951
SEC14L6	ENSG00000214491.7	mRNA	-0.517337	0.00446526	0.033821
RCSD1	ENSG00000198771.9	mRNA	-0.517167	0.00314572	0.029448
BANK1	ENSG00000153064.10	mRNA	-0.517031	0.000768148	0.0156894
HPGDS	ENSG00000163106.9	mRNA	-0.514926	0.00149739	0.0206167
IGSF10	ENSG00000152580.8	mRNA	-0.514492	0.00076097	0.0156623
TMEM243	ENSG00000135185.10	mRNA	-0.513968	0.000983703	0.0172143
RGL1	ENSG00000143344.14	mRNA	-0.511791	0.00355894	0.0311154
PTGER4	ENSG00000171522.5	mRNA	-0.509514	0.00818873	0.0444165
DAPK2	ENSG00000035664.10	mRNA	-0.508823	0.000252361	0.00989645
DOCK2	ENSG00000134516.14	mRNA	-0.50466	0.00358488	0.0311427
CAT	ENSG00000121691.4	mRNA	-0.504249	0.00634926	0.0392361
CTSG	ENSG00000100448.3	mRNA	-0.504207	0.00213654	0.0240533
GRASP	ENSG00000161835.9	mRNA	-0.503977	0.0088034	0.0463441
MACF1	ENSG00000127603.22	mRNA	-0.502916	0.00196007	0.0232044
PAICS	ENSG00000128050.7	mRNA	0.503561	0.00424832	0.0333235
E2F7	ENSG00000165891.14	mRNA	0.517273	0.00127928	0.0190884
PKMYT1	ENSG00000127564.15	mRNA	0.519881	0.00475042	0.0345708
ARHGAP11A	ENSG00000198826.9	mRNA	0.522092	0.0023097	0.0252932
YWHAZ	ENSG00000164924.16	mRNA	0.52241	0.000192287	0.00872026
SMS	ENSG00000102172.14	mRNA	0.525513	0.00256205	0.0265431
BUB1B	ENSG00000156970.11	mRNA	0.528917	0.00889159	0.0465576
KIF23	ENSG00000137807.12	mRNA	0.531515	0.00375486	0.0315127
OIP5	ENSG00000104147.7	mRNA	0.531932	0.00288533	0.0280262
BUB1	ENSG00000169679.13	mRNA	0.532722	0.00476825	0.0346065
LMNB1	ENSG00000113368.10	mRNA	0.53323	0.00574355	0.037799
KIF14	ENSG00000118193.10	mRNA	0.534714	0.00048829	0.0126484
H2AFX	ENSG00000188486.3	mRNA	0.536384	0.00480421	0.0347959
SPC24	ENSG00000161888.10	mRNA	0.537431	0.00385775	0.031902
FAM111B	ENSG00000189057.9	mRNA	0.53848	0.00750594	0.0426332
GINS1	ENSG00000101003.9	mRNA	0.538647	0.00760767	0.0429745
B4GALNT1	ENSG00000135454.12	mRNA	0.539427	0.00857589	0.0455584
ALDOA	ENSG00000149925.15	mRNA	0.547572	0.00136503	0.0195663
TPI1	ENSG00000111669.13	mRNA	0.549864	0.00155054	0.0207808
CENPA	ENSG00000115163.13	mRNA	0.556479	0.00788529	0.0440376
GTSE1	ENSG00000075218.17	mRNA	0.558432	0.00230406	0.025266
SPAG5	ENSG00000076382.15	mRNA	0.559358	0.00898175	0.0468768
CKS1B	ENSG00000173207.11	mRNA	0.560098	0.00472689	0.0345562
MAD2L1	ENSG00000164109.12	mRNA	0.561003	0.00338349	0.030448
MTHFD2	ENSG00000065911.10	mRNA	0.561703	0.00579518	0.0378344
CDC25C	ENSG00000158402.17	mRNA	0.564782	7.76e-05	0.00656273
AURKA	ENSG00000087586.16	mRNA	0.580364	0.00566804	0.0375272
CENPU	ENSG00000151725.10	mRNA	0.583747	0.00408612	0.0326844
UBE2S	ENSG00000108106.12	mRNA	0.584029	0.00648593	0.0397118
IER5L	ENSG00000188483.7	mRNA	0.588254	0.00314781	0.029448
CKAP2L	ENSG00000169607.11	mRNA	0.590777	0.000463433	0.0124044
FKBP4	ENSG00000004478.7	mRNA	0.591796	0.00198679	0.0232155
DEPDC1B	ENSG00000035499.11	mRNA	0.592729	0.00072978	0.0153276
DSG2	ENSG00000046604.11	mRNA	0.594389	0.00853547	0.045429
GPI	ENSG00000105220.13	mRNA	0.594571	0.00162048	0.0211084
STYK1	ENSG00000060140.7	mRNA	0.598929	0.000573094	0.0136571
UCK2	ENSG00000143179.11	mRNA	0.599552	0.00142461	0.0200785
C1QTNF6	ENSG00000133466.12	mRNA	0.601327	0.00183141	0.0224782
NDC80	ENSG00000080986.11	mRNA	0.601426	0.0024111	0.0258801
SKA1	ENSG00000154839.8	mRNA	0.607012	0.000954008	0.0170491
KIF11	ENSG00000138160.5	mRNA	0.609095	0.0020914	0.023817
TFAP2A	ENSG00000137203.9	mRNA	0.610006	0.00509098	0.0356902
DTL	ENSG00000143476.16	mRNA	0.611444	0.000653403	0.0144487
PSMD2	ENSG00000175166.15	mRNA	0.618673	0.000254193	0.00989645
SKA3	ENSG00000165480.14	mRNA	0.618967	0.000309772	0.010674
CDC6	ENSG00000094804.8	mRNA	0.619014	0.00369333	0.0315127
NUSAP1	ENSG00000137804.11	mRNA	0.619258	0.00565142	0.0374957
TYMS	ENSG00000176890.14	mRNA	0.634507	0.00210804	0.0238652
NCAPG	ENSG00000109805.8	mRNA	0.634655	0.000499755	0.0126947
FAM83B	ENSG00000168143.8	mRNA	0.634709	0.00722232	0.0418059
NCAPH	ENSG00000121152.8	mRNA	0.63803	0.00268193	0.0269566
CENPF	ENSG00000117724.11	mRNA	0.640317	0.00431748	0.0334209
ZWINT	ENSG00000122952.15	mRNA	0.649164	0.00299236	0.0285609
ECT2	ENSG00000114346.12	mRNA	0.650363	0.00374822	0.0315127
UBE2T	ENSG00000077152.8	mRNA	0.6584	0.00673172	0.0404074
KIF4A	ENSG00000090889.11	mRNA	0.664764	0.00151101	0.0206978
SPC25	ENSG00000152253.7	mRNA	0.665562	0.000182078	0.0085973
TXN	ENSG00000136810.11	mRNA	0.67253	0.00350059	0.0308736
CEP55	ENSG00000138180.14	mRNA	0.672655	0.00373495	0.0315127
PRR11	ENSG00000068489.11	mRNA	0.674628	0.000466668	0.0124044
PKP2	ENSG00000057294.12	mRNA	0.675311	0.00290923	0.0280262
NEIL3	ENSG00000109674.3	mRNA	0.677726	7.54e-05	0.00656273
PTTG1	ENSG00000164611.11	mRNA	0.682553	0.00171244	0.0218533
CCNE1	ENSG00000105173.12	mRNA	0.686929	0.0015901	0.0209125
CDCA8	ENSG00000134690.9	mRNA	0.688475	0.00188838	0.0227256
SMOX	ENSG00000088826.16	mRNA	0.68927	0.000503927	0.0127202
PBK	ENSG00000168078.8	mRNA	0.692755	0.00299168	0.0285609
CDT1	ENSG00000167513.7	mRNA	0.694721	0.000988637	0.0172143
CDKN3	ENSG00000100526.18	mRNA	0.697428	0.00169735	0.0217696
TSKU	ENSG00000182704.7	mRNA	0.697564	0.00256468	0.0265431
HMMR	ENSG00000072571.18	mRNA	0.702397	0.000209215	0.0092273
TRIB3	ENSG00000101255.9	mRNA	0.702953	0.00277979	0.0274021
PFKP	ENSG00000067057.15	mRNA	0.703077	0.00144933	0.0201277
FSTL3	ENSG00000070404.8	mRNA	0.704274	0.00454055	0.0339919
EXO1	ENSG00000174371.15	mRNA	0.706538	8.23e-05	0.00656273
CDCA5	ENSG00000146670.8	mRNA	0.708115	0.00140773	0.0199644
SLC16A4	ENSG00000168679.16	mRNA	0.709377	0.00425301	0.0333235
KPNA2	ENSG00000182481.7	mRNA	0.71022	0.000826692	0.0162644
DLGAP5	ENSG00000126787.11	mRNA	0.711086	0.000838396	0.0164123
KIF20A	ENSG00000112984.10	mRNA	0.712834	0.00039146	0.011303
NGEF	ENSG00000066248.13	mRNA	0.716058	0.000342609	0.0110164
CDK1	ENSG00000170312.14	mRNA	0.721017	0.00145533	0.020176
CTSV	ENSG00000136943.9	mRNA	0.726542	0.00371246	0.0315127
HJURP	ENSG00000123485.10	mRNA	0.726937	0.000750994	0.0155847
KIF2C	ENSG00000142945.11	mRNA	0.735335	0.00130944	0.0192507
LDHA	ENSG00000134333.12	mRNA	0.745353	1.97e-05	0.00396174
MT1A	ENSG00000205362.9	mRNA	0.745642	0.00920742	0.0476671
CDCP1	ENSG00000163814.6	mRNA	0.745763	0.00034385	0.0110164
CCNB2	ENSG00000157456.6	mRNA	0.74582	0.00115755	0.0183994
SLC16A1	ENSG00000155380.10	mRNA	0.745896	0.00340288	0.0304514
HMGA1	ENSG00000137309.18	mRNA	0.75619	0.00137297	0.01961
PRC1	ENSG00000198901.12	mRNA	0.763059	0.000315026	0.010674
F2RL1	ENSG00000164251.4	mRNA	0.779327	0.00185692	0.0226513
LOXL2	ENSG00000134013.14	mRNA	0.787145	0.0028588	0.0279359
SPOCK1	ENSG00000152377.11	mRNA	0.793867	0.00192847	0.0229959
STC2	ENSG00000113739.9	mRNA	0.798721	0.00148763	0.0205175
ARNTL2	ENSG00000029153.13	mRNA	0.809923	0.00155079	0.0207808
NEK2	ENSG00000117650.11	mRNA	0.820057	0.000180816	0.00858821
EGLN3	ENSG00000129521.12	mRNA	0.823192	0.00981833	0.0492266
MELK	ENSG00000165304.6	mRNA	0.825261	0.000512681	0.0127395
AKAP12	ENSG00000131016.15	mRNA	0.831533	0.000924535	0.0170054
ITGA6	ENSG00000091409.13	mRNA	0.848052	0.00141233	0.0199725
GAPDH	ENSG00000111640.13	mRNA	0.850888	0.000101576	0.00685168
TK1	ENSG00000167900.10	mRNA	0.854931	0.00116293	0.0184378
UBE2C	ENSG00000175063.15	mRNA	0.858076	0.0058028	0.0378344
PPP2R2C	ENSG00000074211.12	mRNA	0.866588	0.00100006	0.0172545
CCNA2	ENSG00000145386.8	mRNA	0.866711	0.000142528	0.00800053
FSCN1	ENSG00000075618.16	mRNA	0.880321	0.0022058	0.0245916
PLK1	ENSG00000166851.13	mRNA	0.886994	2.57e-05	0.00421153
BIRC5	ENSG00000089685.13	mRNA	0.891361	0.0010442	0.0175888
CCNB1	ENSG00000134057.13	mRNA	0.961215	4.71e-05	0.00558648
IL20RB	ENSG00000174564.11	mRNA	0.965469	0.0101139	0.0498673
FOXM1	ENSG00000111206.11	mRNA	0.984657	0.000160969	0.00838359
RRM2	ENSG00000171848.12	mRNA	0.988271	8.58e-05	0.00656273
ANLN	ENSG00000011426.9	mRNA	0.989034	3.85e-05	0.00541756
CDC20	ENSG00000117399.12	mRNA	1.00104	0.000327373	0.0109493
MYBL2	ENSG00000101057.14	mRNA	1.00126	0.00105408	0.0176272
PLEK2	ENSG00000100558.7	mRNA	1.07607	0.000114966	0.00712254
TPX2	ENSG00000088325.14	mRNA	1.10268	7.9e-05	0.00656273
SLC7A5	ENSG00000103257.7	mRNA	1.11214	0.000364238	0.011033
RHOV	ENSG00000104140.6	mRNA	1.16175	0.00110196	0.0180152
GJB3	ENSG00000188910.7	mRNA	1.16772	0.000626205	0.0141195
TNS4	ENSG00000131746.11	mRNA	1.22354	0.00122231	0.0188465
LYPD3	ENSG00000124466.8	mRNA	1.25431	0.00179601	0.0222461
DKK1	ENSG00000107984.8	mRNA	1.29965	0.000424856	0.0117747
LAMC2	ENSG00000058085.13	mRNA	1.30249	0.000446765	0.0121566
SLC2A1	ENSG00000117394.18	mRNA	1.33809	0.000289938	0.0105309
SERPINB5	ENSG00000206075.12	mRNA	1.34275	0.000876999	0.0166512
FAM83A	ENSG00000147689.15	mRNA	1.70503	3.78e-05	0.00541296
KRT6A	ENSG00000205420.9	mRNA	2.16342	0.00106956	0.0177424
