# Supplementary material for: Identifying lncRNAs and mRNAs related to survival of NSCLC based on bioinformatic analysis and machine learning
Source: Aging (Albany NY). 2024 May 1;16(9):7799–817. doi: 10.18632/aging.205783 (PMC11131976; doi:10.18632/aging.205783)
Supplement: Supplementary Table 2 [file aging-16-205783-s003.xlsx]

## Sheet: 单因素cox回归分析
Supplementary Table 2. 30 independent prognostication-related mRNAs.
Symbol	Type	coef	exp(coef)	se(coef)	z	p
FAM83A-AS1	lncRNA	0.23	1.26	0.0424	5.43	5.7e-08
VIM-AS1	lncRNA	-0.276	0.759	0.0845	-3.26	0.0011
BANCR	lncRNA	-0.241	0.786	0.0831	-2.9	0.0037
FEZF1-AS1	lncRNA	-0.131	0.877	0.0479	-2.73	0.0063
SNHG12	lncRNA	-0.159	0.853	0.0622	-2.56	0.011
SH3BP5-AS1	lncRNA	-0.231	0.794	0.0905	-2.55	0.011
SNHG3	lncRNA	-0.153	0.858	0.0611	-2.51	0.012
HLA-DQB1-AS1	lncRNA	-0.112	0.894	0.0527	-2.13	0.033
FAM83A	mRNA	0.15	1.16	0.0278	5.38	7.5e-08
FSTL3	mRNA	0.198	1.22	0.0437	4.53	5.8e-06
AKAP12	mRNA	0.186	1.2	0.0423	4.4	1.1e-05
IER5L	mRNA	0.244	1.28	0.0564	4.34	1.4e-05
LDHA	mRNA	0.307	1.36	0.0715	4.29	1.8e-05
C1QTNF6	mRNA	0.238	1.27	0.0571	4.16	3.1e-05
PLEK2	mRNA	0.171	1.19	0.041	4.17	3.1e-05
GJB3	mRNA	0.147	1.16	0.0353	4.16	3.2e-05
GPD1L	mRNA	-0.262	0.77	0.0636	-4.12	3.8e-05
TNS4	mRNA	0.124	1.13	0.0312	3.97	7.2e-05
ANLN	mRNA	0.195	1.22	0.0491	3.96	7.3e-05
LAMC2	mRNA	0.123	1.13	0.0312	3.93	8.5e-05
SLC2A1	mRNA	0.13	1.14	0.0333	3.91	9.1e-05
HLF	mRNA	-0.207	0.813	0.0542	-3.82	0.00013
DKK1	mRNA	0.111	1.12	0.0293	3.77	0.00016
SMOX	mRNA	0.209	1.23	0.056	3.74	0.00018
PLK1	mRNA	0.204	1.23	0.0546	3.74	0.00019
MBIP	mRNA	-0.234	0.792	0.0634	-3.68	0.00023
FSCN1	mRNA	0.154	1.17	0.0418	3.68	0.00024
LOXL2	mRNA	0.144	1.15	0.0396	3.64	0.00027
RHOV	mRNA	0.117	1.12	0.0327	3.58	0.00034
CXCL17	mRNA	-0.0885	0.915	0.0248	-3.57	0.00036
CDCP1	mRNA	0.206	1.23	0.0592	3.48	0.00051
KRT6A	mRNA	0.0607	1.06	0.0177	3.43	0.0006
HMMR	mRNA	0.209	1.23	0.061	3.43	0.00061
PRR11	mRNA	0.208	1.23	0.0609	3.41	0.00065
PPP2R2C	mRNA	0.148	1.16	0.0436	3.4	0.00067
CLIC6	mRNA	-0.107	0.898	0.0317	-3.38	0.00072
IGSF10	mRNA	-0.284	0.753	0.0865	-3.29	0.001
TMEM243	mRNA	-0.259	0.772	0.0787	-3.29	0.001
PKP2	mRNA	0.163	1.18	0.0497	3.29	0.001
CDC25C	mRNA	0.261	1.3	0.0802	3.26	0.0011
ARNTL2	mRNA	0.148	1.16	0.0452	3.28	0.0011
LIFR	mRNA	-0.171	0.842	0.0533	-3.22	0.0013
GNG7	mRNA	-0.268	0.765	0.0835	-3.21	0.0013
ITGA6	mRNA	0.138	1.15	0.0429	3.22	0.0013
DSG2	mRNA	0.172	1.19	0.0537	3.2	0.0014
CCNB1	mRNA	0.163	1.18	0.0509	3.19	0.0014
TPX2	mRNA	0.135	1.14	0.0422	3.2	0.0014
SLC7A5	mRNA	0.124	1.13	0.0391	3.18	0.0015
FOXM1	mRNA	0.138	1.15	0.044	3.14	0.0017
SUSD4	mRNA	-0.134	0.875	0.043	-3.11	0.0018
NEK2	mRNA	0.165	1.18	0.0528	3.12	0.0018
LYPD3	mRNA	0.0879	1.09	0.0281	3.12	0.0018
ANKRD29	mRNA	-0.177	0.838	0.0574	-3.08	0.002
DNASE1L3	mRNA	-0.224	0.799	0.0725	-3.09	0.002
FAM83B	mRNA	0.145	1.16	0.0472	3.07	0.0021
PFKP	mRNA	0.166	1.18	0.0542	3.07	0.0022
TFAP2A	mRNA	0.148	1.16	0.0487	3.05	0.0023
KIF14	mRNA	0.213	1.24	0.0706	3.02	0.0026
VIPR1	mRNA	-0.191	0.827	0.0636	-3	0.0027
TMEM163	mRNA	-0.165	0.848	0.0549	-3	0.0027
ARHGAP11A	mRNA	0.2	1.22	0.0668	3	0.0027
YWHAZ	mRNA	0.261	1.3	0.0871	3	0.0027
E2F7	mRNA	0.207	1.23	0.0692	2.99	0.0028
ESYT3	mRNA	-0.252	0.777	0.0845	-2.98	0.0029
NGEF	mRNA	0.169	1.18	0.0566	2.98	0.0029
GAPDH	mRNA	0.172	1.19	0.0577	2.97	0.0029
CDCA5	mRNA	0.159	1.17	0.0535	2.96	0.003
TYMS	mRNA	0.161	1.17	0.0546	2.94	0.0032
TPPP	mRNA	-0.15	0.86	0.0511	-2.94	0.0033
DAPK2	mRNA	-0.261	0.77	0.0891	-2.93	0.0034
SERPINB5	mRNA	0.0838	1.09	0.0286	2.93	0.0034
DNALI1	mRNA	-0.146	0.864	0.0503	-2.91	0.0036
PKMYT1	mRNA	0.176	1.19	0.0604	2.91	0.0036
TMEM130	mRNA	-0.17	0.844	0.0584	-2.9	0.0037
CCNA2	mRNA	0.145	1.16	0.05	2.9	0.0037
NFIX	mRNA	-0.152	0.859	0.0525	-2.89	0.0038
FKBP4	mRNA	0.174	1.19	0.0603	2.89	0.0038
HMGA1	mRNA	0.145	1.16	0.0502	2.89	0.0038
EXO1	mRNA	0.176	1.19	0.0613	2.87	0.0041
FAM189A2	mRNA	-0.16	0.852	0.0564	-2.84	0.0045
KPNA2	mRNA	0.159	1.17	0.0559	2.84	0.0045
STC2	mRNA	0.128	1.14	0.045	2.84	0.0045
SNX30	mRNA	-0.202	0.817	0.0714	-2.83	0.0046
CKAP2L	mRNA	0.189	1.21	0.0668	2.83	0.0046
UNC13B	mRNA	-0.16	0.852	0.0565	-2.83	0.0047
CDC20	mRNA	0.119	1.13	0.0423	2.82	0.0048
METTL7A	mRNA	-0.127	0.881	0.0453	-2.8	0.0051
UCK2	mRNA	0.172	1.19	0.0616	2.8	0.0051
CBX7	mRNA	-0.225	0.798	0.0805	-2.8	0.0052
HJURP	mRNA	0.149	1.16	0.0533	2.79	0.0053
PRC1	mRNA	0.15	1.16	0.0538	2.79	0.0053
RRM2	mRNA	0.128	1.14	0.0462	2.78	0.0055
ANKRD44	mRNA	-0.258	0.772	0.0935	-2.76	0.0057
NCAPG	mRNA	0.17	1.19	0.0618	2.76	0.0058
TK1	mRNA	0.127	1.14	0.046	2.76	0.0058
SKA3	mRNA	0.183	1.2	0.0666	2.75	0.006
KIF4A	mRNA	0.151	1.16	0.0552	2.74	0.0061
SLC15A2	mRNA	-0.146	0.864	0.0534	-2.74	0.0062
DAAM2	mRNA	-0.167	0.846	0.0616	-2.71	0.0067
ZNF750	mRNA	-0.107	0.899	0.0394	-2.71	0.0068
DEPDC1B	mRNA	0.171	1.19	0.0633	2.7	0.007
MS4A2	mRNA	-0.25	0.779	0.0928	-2.69	0.0071
KIF20A	mRNA	0.154	1.17	0.0573	2.69	0.0071
ATP13A4	mRNA	-0.114	0.892	0.0426	-2.69	0.0072
AURKA	mRNA	0.151	1.16	0.0565	2.67	0.0076
CLEC3B	mRNA	-0.103	0.903	0.0387	-2.65	0.0081
TNFRSF19	mRNA	-0.129	0.879	0.0488	-2.64	0.0083
ADAMTS8	mRNA	-0.181	0.835	0.0685	-2.64	0.0083
CCNE1	mRNA	0.132	1.14	0.0501	2.64	0.0083
LRIG3	mRNA	-0.144	0.866	0.0546	-2.64	0.0084
ALDOA	mRNA	0.193	1.21	0.0732	2.63	0.0084
CCNB2	mRNA	0.132	1.14	0.05	2.63	0.0085
SLC16A1	mRNA	0.115	1.12	0.0436	2.63	0.0086
IL20RB	mRNA	0.0766	1.08	0.0292	2.63	0.0086
NEIL3	mRNA	0.161	1.18	0.0616	2.62	0.0088
SLC16A4	mRNA	0.118	1.12	0.045	2.62	0.0088
TMPRSS2	mRNA	-0.0999	0.905	0.0382	-2.61	0.009
CAPS	mRNA	-0.111	0.895	0.0426	-2.61	0.0091
BIRC5	mRNA	0.114	1.12	0.0438	2.6	0.0092
DLGAP5	mRNA	0.14	1.15	0.0539	2.59	0.0095
CD1C	mRNA	-0.144	0.866	0.0557	-2.58	0.0099
CPED1	mRNA	-0.205	0.815	0.0801	-2.56	0.01
KIF2C	mRNA	0.129	1.14	0.0499	2.58	0.01
TOX	mRNA	-0.162	0.85	0.0636	-2.55	0.011
CDT1	mRNA	0.139	1.15	0.0546	2.54	0.011
F2RL1	mRNA	0.122	1.13	0.0478	2.56	0.011
CLEC10A	mRNA	-0.145	0.865	0.0574	-2.52	0.012
KHDRBS2	mRNA	-0.253	0.777	0.1	-2.53	0.012
SPC25	mRNA	0.159	1.17	0.063	2.52	0.012
CEP55	mRNA	0.126	1.13	0.0501	2.51	0.012
SFTA3	mRNA	-0.08	0.923	0.0323	-2.48	0.013
GDF10	mRNA	-0.169	0.845	0.0678	-2.49	0.013
RGL1	mRNA	-0.16	0.852	0.0646	-2.48	0.013
CKS1B	mRNA	0.141	1.15	0.0565	2.49	0.013
MAD2L1	mRNA	0.148	1.16	0.0598	2.48	0.013
ECT2	mRNA	0.125	1.13	0.0506	2.48	0.013
MELK	mRNA	0.118	1.13	0.0474	2.5	0.013
GGTLC1	mRNA	-0.0975	0.907	0.0397	-2.45	0.014
BTNL9	mRNA	-0.153	0.858	0.0625	-2.45	0.014
DTL	mRNA	0.153	1.17	0.0625	2.45	0.014
EGLN3	mRNA	0.0854	1.09	0.0347	2.46	0.014
COL4A3	mRNA	-0.161	0.851	0.0664	-2.43	0.015
GTSE1	mRNA	0.147	1.16	0.0605	2.43	0.015
PSMD2	mRNA	0.169	1.18	0.0691	2.44	0.015
ADRB2	mRNA	-0.148	0.862	0.0635	-2.34	0.019
CDK1	mRNA	0.118	1.13	0.0504	2.35	0.019
UBE2C	mRNA	0.0898	1.09	0.0384	2.34	0.019
MYBL2	mRNA	0.0886	1.09	0.0378	2.35	0.019
IL33	mRNA	-0.0915	0.913	0.0395	-2.32	0.02
HPGDS	mRNA	-0.174	0.841	0.0749	-2.32	0.02
NCAPH	mRNA	0.123	1.13	0.053	2.33	0.02
PLEKHB1	mRNA	-0.123	0.884	0.0534	-2.31	0.021
BTG2	mRNA	-0.118	0.889	0.0512	-2.31	0.021
PAICS	mRNA	0.15	1.16	0.0653	2.3	0.021
KIF23	mRNA	0.141	1.15	0.061	2.31	0.021
SKA1	mRNA	0.141	1.15	0.0613	2.3	0.021
CD69	mRNA	-0.125	0.882	0.0546	-2.3	0.022
KIF11	mRNA	0.133	1.14	0.0579	2.3	0.022
SPOCK1	mRNA	0.0972	1.1	0.0423	2.3	0.022
CACNA2D2	mRNA	-0.0823	0.921	0.0363	-2.27	0.023
PTTG1	mRNA	0.125	1.13	0.0547	2.28	0.023
ATP8A1	mRNA	-0.139	0.87	0.062	-2.25	0.025
CENPF	mRNA	0.113	1.12	0.0502	2.24	0.025
CTSH	mRNA	-0.0898	0.914	0.0404	-2.22	0.026
CIITA	mRNA	-0.132	0.877	0.0591	-2.23	0.026
CGNL1	mRNA	-0.128	0.879	0.0577	-2.22	0.026
P2RY13	mRNA	-0.149	0.862	0.067	-2.22	0.026
MFSD2A	mRNA	-0.108	0.898	0.0488	-2.22	0.027
SCN7A	mRNA	-0.144	0.866	0.0648	-2.22	0.027
BUB1	mRNA	0.131	1.14	0.0595	2.21	0.027
BMP5	mRNA	-0.114	0.893	0.0517	-2.2	0.028
DPEP2	mRNA	-0.175	0.839	0.0795	-2.2	0.028
CAT	mRNA	-0.135	0.874	0.0615	-2.2	0.028
TRIB3	mRNA	0.107	1.11	0.049	2.19	0.028
MS4A15	mRNA	-0.084	0.919	0.0385	-2.18	0.029
OIP5	mRNA	0.135	1.14	0.0623	2.16	0.031
NUSAP1	mRNA	0.109	1.11	0.0505	2.16	0.031
GPRIN2	mRNA	-0.108	0.898	0.0503	-2.15	0.032
BTK	mRNA	-0.139	0.871	0.0648	-2.14	0.032
NDC80	mRNA	0.122	1.13	0.057	2.14	0.032
CDKN3	mRNA	0.111	1.12	0.0517	2.14	0.032
HLA-DMB	mRNA	-0.0903	0.914	0.0424	-2.13	0.033
ITGAL	mRNA	-0.111	0.895	0.052	-2.13	0.033
PLEKHH2	mRNA	-0.158	0.854	0.0744	-2.12	0.034
STYK1	mRNA	0.138	1.15	0.0651	2.11	0.034
CDC6	mRNA	0.112	1.12	0.0532	2.12	0.034
BUB1B	mRNA	0.117	1.12	0.0554	2.11	0.035
CDCA8	mRNA	0.106	1.11	0.0505	2.11	0.035
ZNF692	mRNA	-0.131	0.877	0.0626	-2.09	0.036
UBE2S	mRNA	0.112	1.12	0.0533	2.1	0.036
KCNJ15	mRNA	-0.0946	0.91	0.046	-2.06	0.04
BANK1	mRNA	-0.159	0.853	0.0783	-2.03	0.042
CENPU	mRNA	0.112	1.12	0.0549	2.03	0.042
PABPC1L	mRNA	-0.0946	0.91	0.0471	-2.01	0.045
FAM111B	mRNA	0.107	1.11	0.0537	1.99	0.046
H2AFX	mRNA	0.122	1.13	0.0615	1.99	0.047
CTSV	mRNA	0.087	1.09	0.0439	1.98	0.047
RAB11FIP1	mRNA	-0.1	0.904	0.0509	-1.97	0.048
ZWINT	mRNA	0.103	1.11	0.0521	1.98	0.048
RTKN2	mRNA	-0.121	0.886	0.0615	-1.97	0.049
PBK	mRNA	0.0955	1.1	0.0485	1.97	0.049

## Sheet: 多因素cox回归分析
Symbol	coef	Hazard Ratio	lower .95	upper .95	Pr(>|z|)
FSTL3	0.245313	1.27802	1.077	1.5165	0.00248
FAM83A	0.166587	1.18127	1.048	1.3315	0.00319
SFTA3	0.284747	1.32943	1.0748	1.6443	0.00433
TOX	-0.294057	0.745234	0.5958	0.9322	0.005015
CDK1	0.472454	1.60393	1.1156	2.3059	0.005375
TYMS	0.403801	1.49751	1.0958	2.0465	0.00564
COL4A3	-0.341363	0.7108	0.5313	0.9509	0.01076
ZWINT	-0.441441	0.643109	0.4397	0.9406	0.011435
E2F7	0.385448	1.47027	1.0457	2.0672	0.013305
DEPDC1B	0.437472	1.54879	1.0489	2.2868	0.013895
KPNA2	0.480467	1.61683	1.0356	2.5243	0.017265
ADRB2	-0.271354	0.762346	0.5905	0.9841	0.01864
SNX30	-0.35388	0.701959	0.5029	0.9798	0.01877
RAB11FIP1	-0.183201	0.832601	0.7005	0.9897	0.018865
CGNL1	0.285798	1.33082	1.0101	1.7533	0.021095
CLIC6	-0.114295	0.891995	0.7982	0.9968	0.021905
DNASE1L3	-0.240303	0.786389	0.6216	0.9948	0.02256
RGL1	0.273731	1.31486	1.1985	1.7314	0.02561
TRIB3	0.176215	1.19269	1.0986	1.4245	0.02589
CPED1	-0.399014	0.670982	0.4483	0.9042	0.026205
CDC6	-0.372396	0.689082	0.4698	0.9153	0.028355
ZNF692	-0.345348	0.707974	0.4914	0.9199	0.031865
IER5L	0.192835	1.21268	1.0863	1.4911	0.033705
PKMYT1	0.363891	1.43892	1.1644	2.1469	0.037345
AKAP12	0.142231	1.15284	1.0856	1.3484	0.037625
ATP13A4	0.170936	1.18642	1.0818	1.4336	0.038345
CEP55	-0.396827	0.67245	0.429	0.9541	0.041785
METTL7A	0.157596	1.17069	1.0773	1.4024	0.043605
LAMC2	-0.126968	0.880762	0.7606	0.9199	0.04489
NDC80	-0.349901	0.704758	0.4696	0.9578	0.045625
